# Supplementary material for: Analysis of serum adiponectin and leptin in patients with acute exacerbation of idiopathic pulmonary fibrosis
Source: PubMed Central journal article supplement (PMC6642131; doi:10.1038/s41598-019-46990-3), 2019-07-19
Supplement: 41598_2019_46990_MOESM1_ESM.pdf [file 41598_2019_46990_MOESM1_ESM.pdf]

## Supplementary Information

**TITLE: Analysis of serum adiponectin and leptin in patients with acute exacerbation of idiopathic pulmonary fibrosis**

**Authors' full names:** Noriyuki Enomoto, M.D., Ph.D.<sup>1,2,\*</sup>, Yoshiyuki Oyama, M.D.<sup>1</sup>, Hideki Yasui, M.D., Ph.D.<sup>1</sup>, Masato Karayama, M.D., Ph.D.<sup>1</sup>, Hironao Hozumi, M.D., Ph.D.<sup>1</sup>, Yuzo Suzuki, M.D., Ph.D.<sup>1</sup>, Masato Kono, M.D., Ph.D.<sup>1</sup>, Kazuki Furuhashi, M.D., Ph.D.<sup>1</sup>, Tomoyuki Fujisawa, M.D., Ph.D.<sup>1</sup>, Naoki Inui, M.D., Ph.D.<sup>1,3</sup>, Yutaro Nakamura, M.D., Ph.D.<sup>1</sup>, Takafumi Suda, M.D., Ph.D.<sup>1</sup>

**Authors' affiliation(s):**

<sup>1</sup> Second Division, Department of Internal Medicine, Hamamatsu University School of Medicine, Hamamatsu, Japan

<sup>2</sup> Health Administration Center, Hamamatsu University School of Medicine, Hamamatsu, Japan

<sup>3</sup> Department of Clinical Pharmacology and Therapeutics, Hamamatsu University School of Medicine, Hamamatsu, Japan

**Supplementary Figure S1.** Relationships between serum adiponectin/leptin levels and clinical parameters other than data shown in Fig 2. The relationships between serum adiponectin/leptin (A/L) ratio at AE-IPF and other clinical parameters are shown. A/L ratio showed no relationships with age (a;  $p=0.545$ ,  $r=-0.099$ ), smoking pack years (b;  $p=0.080$ ,  $r=-0.280$ ), %FVC (c;  $p=0.711$ ,  $r=-0.077$ ), GAP stage (d;  $p=0.301$ ,  $\rho=-0.181$ ), JRS severity stage (e;  $p=0.937$ ,  $\rho=-0.014$ ) before AE, or serum SP-D level (f;  $p=0.162$ ,  $r=-0.242$ ). “%FVC, GAP stage, and JRS severity stage before AE” were evaluated within 12 months before AE-IPF.

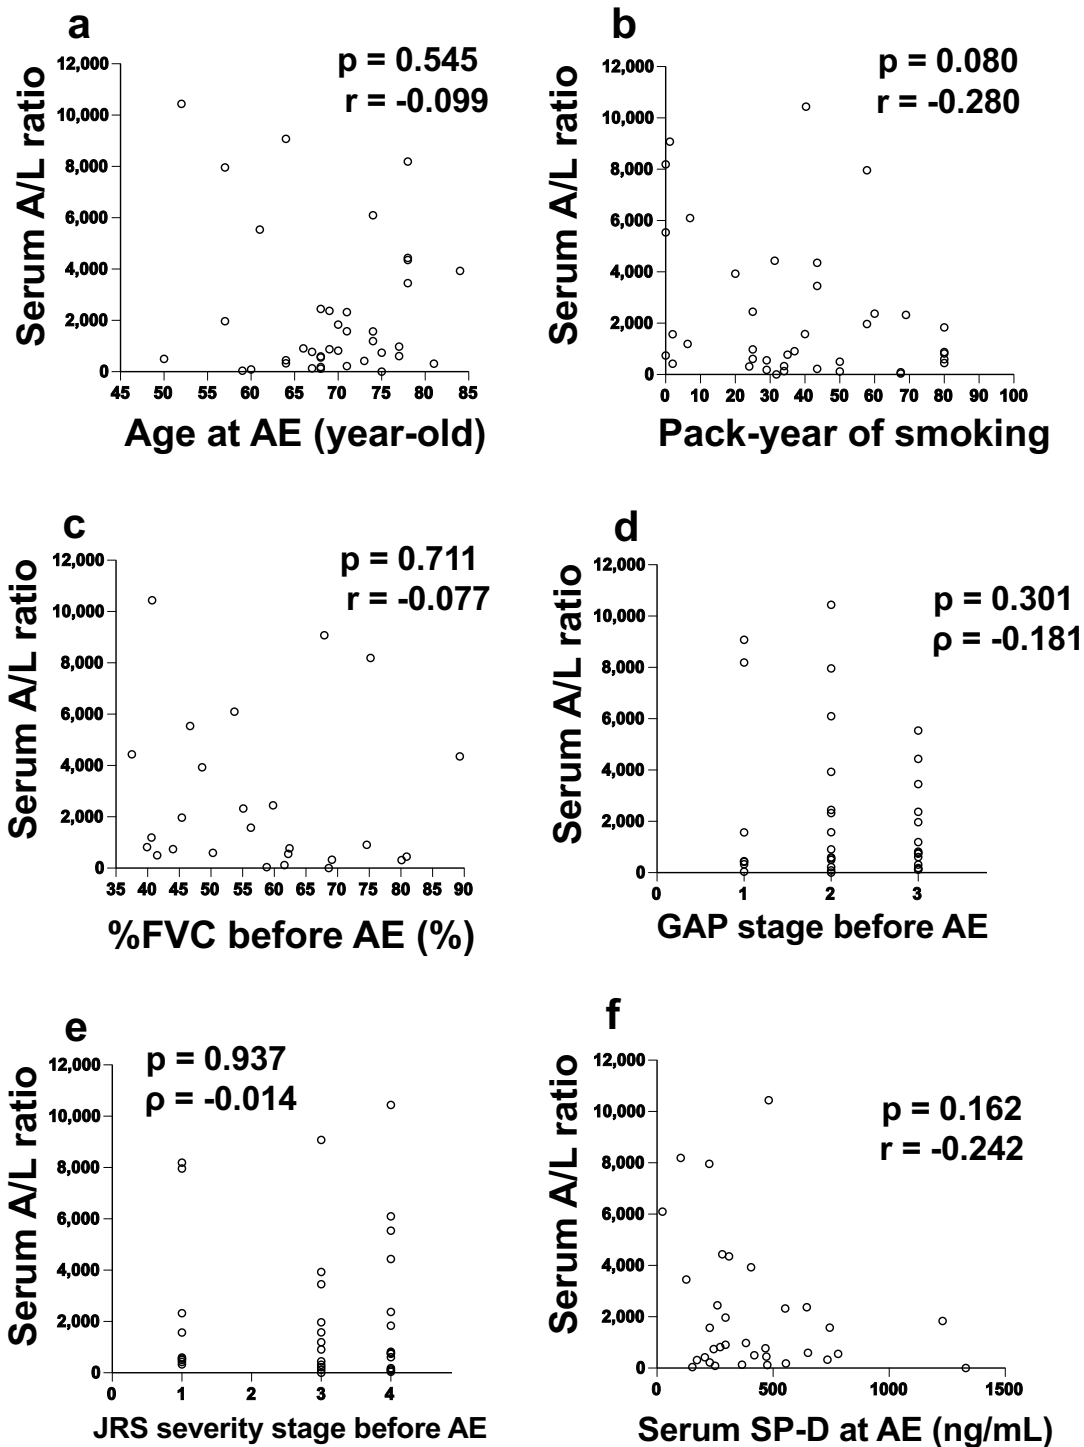

**Supplementary Table S1.** Clinical characteristics, severity, and treatments for IPF and/or AE-IPF (others)

|                                                                 | <b>n=39 episodes,<br/>median (range)</b> |
|-----------------------------------------------------------------|------------------------------------------|
| Diagnosis of IPF, surgical lung biopsy / clinical, n            | 20 / 19                                  |
| Hyperlipidemia, + / -                                           | 5 / 35                                   |
| Diabetes mellitus, + / -                                        | 16 / 24                                  |
| Exogenous PPAR $\gamma$ agonist (e.g. pioglitazone, ARB), + / - | 9 / 31                                   |
| FEV1 / FVC before AE, %                                         | 87.9 (78.5, 107)                         |
| Serum LDH within 3 months before AE, IU/L                       | 273 (168, 451)                           |
| Serum KL-6 within 3 months before AE, U/mL                      | 1170 (400, 3570)                         |
| Serum SP-D within 3 months before AE, ng/mL                     | 255 (86, 531)                            |
| HRCT pattern of AE, peripheral / multifocal / diffuse           | 3 / 2 / 32                               |
| Treatment with PMX-DHP, + / -                                   | 20 / 20                                  |

Abbreviations; IPF: idiopathic pulmonary fibrosis, AE: acute exacerbation, PPAR $\gamma$ : peroxisome proliferator-activated receptor, ARB: angiotensin II receptor blocker, FEV1: forced expiratory volume in one second, FVC: forced vital capacity, LDH: lactate dehydrogenase, KL-6: Krebs von den Lungen-6, SP-D: surfactant protein D, HRCT: high-resolution computed tomography, PMX-DHP: direct haemoperfusion with a polymyxin B-immobilised fibre column.

**Supplementary Table S2.** Comparison of data between patients with high and low adiponectin/leptin ratios

|                                                                    | Adiponectin/Leptin<br>ratio <905<br>(n=15, median (range)) | Adiponectin/Leptin<br>ratio ≥905<br>(n=17, median (range)) | p value |
|--------------------------------------------------------------------|------------------------------------------------------------|------------------------------------------------------------|---------|
| Age, years                                                         | 68 (50, 81)                                                | 71 (52, 84)                                                | ns.     |
| Sex, male / female                                                 | 14 / 1                                                     | 16 / 1                                                     | ns.     |
| Smoking, never / ex / current                                      | 1 / 12 / 2                                                 | 2 / 13 / 2                                                 | ns.     |
| Smoking pack years                                                 | 43.5 (0, 80)                                               | 31.3 (0, 80)                                               | ns.     |
| Period from IPF-diagnosis to AE, mo                                | 100 (1, 203)                                               | 55 (0, 146)                                                | ns.     |
| The number of AEs, 1 / 2                                           | 14 / 1                                                     | 16 / 1                                                     | ns.     |
| Observation period from the onset of AE, days                      | 95 (2, 205)                                                | 35 (4, 139)                                                | 0.029   |
| BMI                                                                | 23.0 (20.2, 28.9)                                          | 20.7 (16.3, 27.7)                                          | 0.023   |
| Body surface area, m <sup>2</sup>                                  | 1.7 (1.4, 1.9)                                             | 1.5 (1.4, 1.9)                                             | ns.     |
| Hyperlipidemia, + / -                                              | 3 / 12                                                     | 1 / 16                                                     | ns.     |
| Diabetes mellitus, + / -                                           | 7 / 8                                                      | 5 / 12                                                     | ns.     |
| Exogenous PPAR $\gamma$ agonist (e.g. pioglitazone, ARB), + / -    | 5 / 10                                                     | 1 / 16                                                     | ns.     |
| Peripheral blood WBC at AE, $\times 10^3/\mu\text{L}$              | 8.3 (1.9, 17.6)                                            | 10.3 (5.5, 20.0)                                           | ns.     |
| Peripheral blood neutrophils at AE, $\times 10^3/\mu\text{L}$      | 6.2 (1.5, 15.3)                                            | 7.5 (5.0, 18.2)                                            | ns.     |
| Serum CRP at AE, mg/dL                                             | 5.5 (1.1, 23.7)                                            | 11.3 (0.9, 21.9)                                           | ns.     |
| Serum LDH at AE, IU/L                                              | 365 (220, 601)                                             | 319 (183, 464)                                             | ns.     |
| Serum KL-6 at AE, U/mL                                             | 2320 (1034, 6404)                                          | 1122 (481, 2640)                                           | 0.022   |
| Serum SP-D at AE, ng/mL                                            | 443 (152, 1330)                                            | 347 (23, 1230)                                             | ns.     |
| P/F ratio at AE                                                    | 192 (38, 386)                                              | 167 (44, 368)                                              | ns.     |
| HRCT extent scores at AE (full score: 25)                          | 20.5 (14, 25)                                              | 19 (13, 22)                                                | ns.     |
| HRCT pattern at AE,<br>peripheral / multifocal / diffuse / unknown | 1 / 1 / 12 / 1                                             | 2 / 1 / 12 / 2                                             | ns.     |
| Period from admission to the beginning of AE treatment, days       | 1 (0, 17)                                                  | 0 (0, 6)                                                   | ns.     |
| Administration of steroid pulse therapy, + / -                     | 15 / 0                                                     | 17 / 0                                                     | ns.     |
| Administration of Sivelestat sodium hydrate, + / -                 | 3 / 12                                                     | 4 / 13                                                     | ns.     |
| Administration of Immunosuppressant, + / -                         | 13 / 2                                                     | 8 / 9                                                      | 0.028   |
| Treatment with PMX-DHP, + / -                                      | 9 / 6                                                      | 7 / 10                                                     | ns.     |
| Intubation at AE, + / -                                            | 3 / 12                                                     | 5 / 12                                                     | ns.     |
| $\Delta$ LDH at 2 days after beginning AE treatment, IU/L          | -54 (-94, 307)                                             | -32.5 (-145, 425)                                          | ns.     |
| $\Delta$ P/F ratio at 2 days after beginning AE treatment          | 40.0 (-146, 200)                                           | -10.0 (-92.0, 128)                                         | ns.     |
| <b>Data before AE *</b>                                            |                                                            |                                                            |         |
| PaO <sub>2</sub> at rest, Torr                                     | 78.0 (52.0, 91.0)                                          | 71.4 (49.0, 79.0)                                          | ns.     |
| Distance in 6MWT, m                                                | 365 (160, 507)                                             | 375 (170, 465)                                             | ns.     |
| Minimum SpO <sub>2</sub> in 6MWT, %                                | 82 (60, 95)                                                | 83 (73, 87)                                                | ns.     |
| HRCT extent scores (full score: 25)                                | 12.5 (7, 19)                                               | 12 (8, 16)                                                 | ns.     |
| FVC, % pred                                                        | 61.9 (39.9, 80.9)                                          | 54.4 (37.5, 89.3)                                          | ns.     |
| FEV1 / FVC before AE *, %                                          | 87.3 (78.5, 107.0)                                         | 87.9 (79.7, 98.7)                                          | ns.     |
| DL <sub>CO</sub> before AE *, % pred                               | 73.9 (47.4, 79.8)                                          | 50.0 (33.5, 85.9)                                          | ns.     |
| JRS severity grade,<br>I / II / III / IV / unknown                 | 5 / 0 / 5 / 4 / 1                                          | 2 / 0 / 6 / 6 / 3                                          | ns.     |
| The GAP staging system,<br>I / II / III / unknown                  | 4 / 5 / 5 / 1                                              | 2 / 6 / 5 / 4                                              | ns.     |
| Preceding treatments for IPF, + / -                                | 7 / 8                                                      | 10 / 7                                                     | ns.     |
| Preceding oxygen therapy, + / -                                    | 6 / 9                                                      | 4 / 13                                                     | ns.     |

\* Pulmonary function tests, severity scores, HRCT, and serum markers were evaluated within 12 months before AE-IPF.

Abbreviations; IPF: idiopathic pulmonary fibrosis, AE: acute exacerbation, BMI: body mass index, PPAR: peroxisome proliferator-activated receptor, PaO<sub>2</sub>: partial pressure of arterial oxygen, 6MWT: 6-minute walk test, SpO<sub>2</sub>: partial oxygen saturation, HRCT: high-resolution computed tomography, PMX-DHP: direct haemoperfusion with a polymyxin B-immobilised fibre column, FVC: forced vital capacity, FEV<sub>1</sub>: forced expiratory volume in one second, DL<sub>CO</sub>: diffusion lung capacity for carbon monoxide, JRS: Japanese respiratory society, GAP: gender, age, and physiology, WBC: white blood cell, CRP: c-reactive protein, LDH: lactate dehydrogenase, KL-6: Krebs von den Lungen-6, SP-D: surfactant protein D, P/F: PaO<sub>2</sub>/FiO<sub>2</sub>, ns.: not significant.

**Supplementary Table S3.** Univariate Cox Proportional Hazards models of survival

| Variable                                                     | Hazard ratio | 95% CI |       | p value |
|--------------------------------------------------------------|--------------|--------|-------|---------|
|                                                              |              | lower  | upper |         |
| Age, yr                                                      | 1.030        | 0.964  | 1.100 | ns.     |
| Sex, male                                                    | 0.272        | 0.058  | 1.270 | ns.     |
| Smoking pack years                                           | 0.984        | 0.967  | 1.002 | ns.     |
| Period from IPF-diagnosis to AE, mo                          | 0.998        | 0.991  | 1.006 | ns.     |
| BMI                                                          | 0.941        | 0.814  | 1.089 | ns.     |
| Body surface area, m <sup>2</sup>                            | 0.194        | 0.011  | 3.300 | ns.     |
| Exogenous PPAR $\gamma$ agonist (e.g. pioglitazone, ARB), +  | 0.515        | 0.152  | 1.742 | ns.     |
| FVC before AE *, % pred                                      | 0.983        | 0.946  | 1.021 | ns.     |
| FEV <sub>1</sub> / FVC before AE *, %                        | 0.970        | 0.896  | 1.049 | ns.     |
| DL <sub>CO</sub> before AE *, % pred                         | 0.984        | 0.950  | 1.019 | ns.     |
| Resting PaO <sub>2</sub> before AE *, mmHg                   | 0.993        | 0.949  | 1.039 | ns.     |
| Distance in 6MWT before AE *, m                              | 0.995        | 0.989  | 1.002 | ns.     |
| Minimum SpO <sub>2</sub> in 6MWT before AE *, %              | 0.937        | 0.872  | 1.008 | ns.     |
| JRS severity grade before AE *                               | 1.528        | 0.994  | 2.347 | ns.     |
| The GAP staging system before AE *                           | 1.340        | 0.712  | 2.522 | ns.     |
| Extent score on HRCT before AE *                             | 1.096        | 0.945  | 1.272 | ns.     |
| Preceding treatments for IPF, +                              | 0.903        | 0.398  | 2.048 | ns.     |
| Preceding oxygen therapy, +                                  | 2.318        | 0.970  | 5.537 | ns.     |
| Serum adiponectin, ng/mL                                     | 1.000        | 1.000  | 1.000 | ns.     |
| Serum leptin, ng/mL                                          | 0.930        | 0.858  | 1.008 | ns.     |
| Adiponectin/leptin ratio                                     | 1.000        | 1.000  | 1.000 | 0.006   |
| Adiponectin/leptin ratio, $\geq 905$                         | 2.729        | 1.093  | 6.815 | 0.032   |
| Peripheral blood WBC at AE, / $\mu$ L                        | 1.000        | 1.000  | 1.000 | ns.     |
| Peripheral blood neutrophils at AE, / $\mu$ L                | 1.000        | 1.000  | 1.000 | 0.027   |
| Serum CRP at AE, mg/dL                                       | 1.034        | 0.975  | 1.097 | ns.     |
| Serum LDH at AE, IU/L                                        | 1.000        | 0.994  | 1.006 | ns.     |
| Serum KL-6 at AE, U/mL                                       | 1.000        | 0.999  | 1.000 | ns.     |
| Serum SP-D at AE, ng/mL                                      | 0.999        | 0.997  | 1.001 | ns.     |
| P/F ratio at AE                                              | 0.996        | 0.992  | 1.001 | ns.     |
| Extent score on HRCT at AE                                   | 1.065        | 0.950  | 1.195 | ns.     |
| Period from admission to the beginning of AE treatment, days | 1.126        | 1.010  | 1.255 | 0.032   |

\* Pulmonary function tests, severity scores, HRCT, and serum markers were evaluated within 12 months before AE-IPF.

Abbreviations; IPF: idiopathic pulmonary fibrosis, AE: acute exacerbation, BMI: body mass index, PPAR: peroxisome proliferator-activated receptor, FVC: forced vital capacity, FEV<sub>1</sub>: forced expiratory volume in one second, DL<sub>CO</sub>: diffusion lung capacity for carbon monoxide, PaO<sub>2</sub>: partial pressure of arterial oxygen, 6MWT: 6-minute walk test, SpO<sub>2</sub>: partial oxygen saturation, JRS: Japanese respiratory society, GAP: gender, age, and physiology, HRCT: high-resolution computed tomography, WBC: white blood cell, CRP: c-reactive protein, LDH: lactate dehydrogenase, KL-6: Krebs von den Lungen-6, SP-D: surfactant protein D, P/F: PaO<sub>2</sub>/FiO<sub>2</sub>, ns.: not significant..

**Supplementary Table S4.** Multivariate Cox Proportional Hazards models of survival adjusted for BMI

| Variable                             | Hazard Ratio | 95% CI |       | p Value |
|--------------------------------------|--------------|--------|-------|---------|
|                                      |              | lower  | upper |         |
| Serum adiponectin, ng/mL             | 1.000        | 1.000  | 1.000 | ns.     |
| Serum leptin, ng/mL                  | 0.934        | 0.860  | 1.015 | ns.     |
| Adiponectin/leptin ratio             | 1.000        | 1.000  | 1.000 | 0.011   |
| Adiponectin/leptin ratio, $\geq 905$ | 2.680        | 1.017  | 7.060 | 0.046   |

Abbreviations; BMI: body mass index, ns.: not significant.
